# Supplementary material for: Adenosine Receptors Differentially Regulate the Expression of Regulators of G-Protein Signalling (RGS) 2, 3 and 4 in Astrocyte-Like Cells
Source: PubMed Central journal article supplement (PMC4532427; doi:10.1371/journal.pone.0134934), 2015-08-11

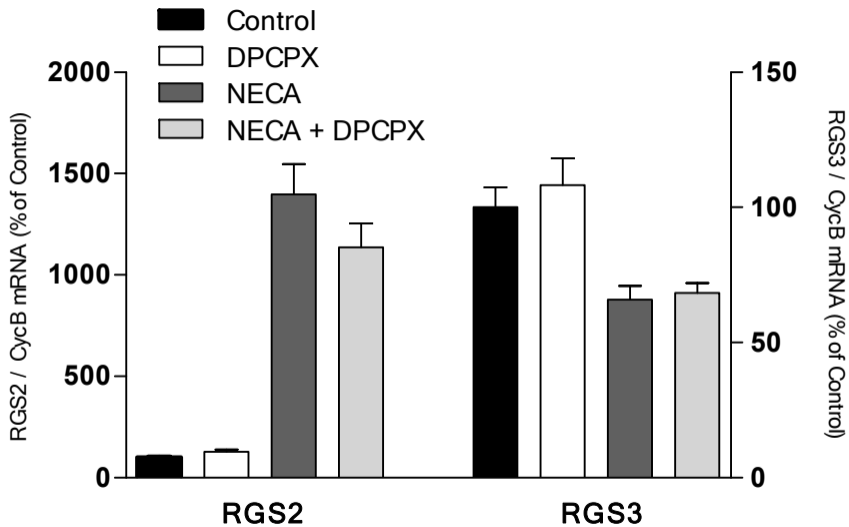

Supplement: pone.0134934.s001.pdf [file pone.0134934.s001.pdf]
